# Supplementary material
Source: HighWire-hosted journal article supplement (https://erj.ersjournals.com/content/60/5/2200483)

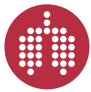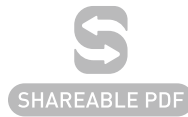

# Participation in community-based lung cancer screening: the Yorkshire Lung Screening Trial

Philip A.J. Crosbie<sup>1,2,15</sup>, Rhian Gabe<sup>3,15</sup>, Irene Simmonds<sup>4</sup>, Neil Hancock<sup>4</sup>, Panos Alexandris<sup>3</sup>, Martyn Kennedy<sup>5</sup>, Suzanne Rogerson<sup>5</sup>, David Baldwin<sup>6</sup>, Richard Booton<sup>1,2,7</sup>, Claire Bradley<sup>8</sup>, Mike Darby<sup>5</sup>, Claire Eckert<sup>4</sup>, Kevin N. Franks<sup>4,5</sup>, Jason Lindop<sup>5</sup>, Sam M. Janes<sup>9</sup>, Henrik Møller<sup>10</sup>, Rachael L. Murray<sup>11</sup>, Richard D. Neal<sup>12</sup>, Samantha L. Quaife<sup>13</sup>, Sara Upperton<sup>5</sup>, Bethany Shinkins<sup>4</sup>, Puvan Tharmanathan<sup>14</sup> and Matthew E.J. Callister<sup>4,5</sup>

<sup>1</sup>Division of Infection, Immunity and Respiratory Medicine, University of Manchester, Manchester, UK. <sup>2</sup>Manchester Thoracic Oncology Centre, Manchester University NHS Foundation Trust, Manchester, UK. <sup>3</sup>Centre for Cancer Prevention, Queen Mary University of London, London, UK. <sup>4</sup>Institute of Health Sciences, University of Leeds, Leeds, UK. <sup>5</sup>Leeds Teaching Hospitals NHS Trust, Leeds, UK. <sup>6</sup>Dept of Respiratory Medicine, Nottingham University Hospitals, Nottingham, UK. <sup>7</sup>Manchester Academic Health Science Centre, University of Manchester, Manchester, UK. <sup>8</sup>Craigavon Area Hospital, Southern Health and Social Care Trust, Portadown, UK. <sup>9</sup>Lungs for Living Research Centre, UCL Respiratory, University College London, London, UK. <sup>10</sup>The Danish Clinical Quality Program and Clinical Registries (RKKP), Aarhus, Denmark. <sup>11</sup>Lifespan and Population Health, School of Medicine, University of Nottingham, Nottingham, UK. <sup>12</sup>College of Medicine and Health, University of Exeter, Exeter, UK. <sup>13</sup>Wolfson Institute of Population Health, Queen Mary University of London, London, UK. <sup>14</sup>York Trials Unit, York, UK. <sup>15</sup>These two authors contributed equally.

Corresponding author: Matthew E.J. Callister ([matthew.callister@nhs.net](mailto:matthew.callister@nhs.net))

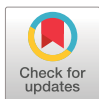

Shareable abstract (@ERSpublications)

Telephone triage followed by community-based lung cancer screening is an effective model of screening delivery. However, lower participation in people who currently smoke and those from more deprived areas is notable and requires further research. <https://bit.ly/38O9z2m>

**Cite this article as:** Crosbie PAJ, Gabe R, Simmonds I, *et al.* Participation in community-based lung cancer screening: the Yorkshire Lung Screening Trial. *Eur Respir J* 2022; 60: 2200483 [DOI: 10.1183/13993003.00483-2022].

This single-page version can be shared freely online.

## Abstract

**Background** Screening with low-dose computed tomography (LDCT) reduces lung cancer mortality; however, the most effective strategy for optimising participation is unknown. Here we present data from the Yorkshire Lung Screening Trial, including response to invitation, screening eligibility and uptake of community-based LDCT screening.

**Methods** Individuals aged 55–80 years, identified from primary care records as having ever smoked, were randomised prior to consent to invitation to telephone lung cancer risk assessment or usual care. The invitation strategy included general practitioner endorsement, pre-invitation and two reminder invitations. After telephone triage, those at higher risk were invited to a Lung Health Check (LHC) with immediate access to a mobile CT scanner.

**Results** Of 44 943 individuals invited, 50.8% (n=22 815) responded and underwent telephone-based risk assessment (16.7% and 7.3% following first and second reminders, respectively). A lower response rate was associated with current smoking status (adjusted OR 0.44, 95% CI 0.42–0.46) and socioeconomic deprivation (adjusted OR 0.58, 95% CI 0.54–0.62 for the most versus the least deprived quintile). Of those responding, 34.4% (n=7853) were potentially eligible for screening and offered a LHC, of whom 86.8% (n=6819) attended. Lower uptake was associated with current smoking status (adjusted OR 0.73, 95% CI 0.62–0.87) and socioeconomic deprivation (adjusted OR 0.78, 95% CI 0.62–0.98). In total, 6650 individuals had a baseline LDCT scan, representing 99.7% of eligible LHC attendees.

**Conclusions** Telephone risk assessment followed by a community-based LHC is an effective strategy for lung cancer screening implementation. However, lower participation associated with current smoking status and socioeconomic deprivation underlines the importance of research to ensure equitable access to screening.

Copyright ©The authors 2022.

This version is distributed under the terms of the Creative Commons Attribution Non-Commercial Licence 4.0. For commercial reproduction rights and permissions contact [permissions@ersnet.org](mailto:permissions@ersnet.org)

Received: 5 March 2022  
Accepted: 17 May 2022

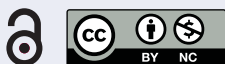

Supplement: inline-supplementary-material-1 [file inline-supplementary-material-1.pdf]
